# Supplementary material for: A novel strategy for community screening of SARS-CoV-2 (COVID-19): Sample pooling method
Source: PubMed Central journal article supplement (PMC7454965; doi:10.1371/journal.pone.0238417), 2020-08-28
Supplement: pone.0238417.s001.pdf [file pone.0238417.s001.pdf]

S1 Table. Primers and probes for qRT-PCR, SARS-CoV-2 detection<sup>a</sup>.

| Gene target                               | Oligonucleotide | Sequence <sup>b</sup>                    |
|-------------------------------------------|-----------------|------------------------------------------|
| RNA-dependent<br>RNA polymerase<br>(RdRP) | RdRp_SARSr-F    | 5'-GTGARATGGTCATGTGTGGCGG-3'             |
|                                           | RdRp_SARSr-R    | 5'-CARATGTTAAASACACTATTAGCATA-3'         |
|                                           | RdRP_SARSr-P1   | 5'-FAM-CCAGGTGGWACRTCATCMGGTGATGC-BBQ-3' |
|                                           | RdRp_SARSr-P2   | 5'-FAM-CAGGTGGAACCTCATCAGGAGATGC-BBQ-3'  |

<sup>a</sup> Oligonucleotide sequences were adapted from the WHO-Charité protocol [1].

<sup>b</sup> W is A/T; R is G/A; M is A/C; S is G/C. FAM: 6-carboxyfluorescein; BBQ: blackberry quencher.

## References

1. Corman VM, Landt O, Kaiser M, Molenkamp R, Meijer A, Chu DKW, et al. Detection of 2019 novel coronavirus (2019-nCoV) by real-time RT-PCR. *Eurosurveillance*. 2020;25(3). Epub 2020/01/30. doi: 10.2807/1560-7917.ES.2020.25.3.2000045. PubMed PMID: 31992387; PubMed Central PMCID: PMC6988269.
