# Supplementary material for: A novel strategy for community screening of SARS-CoV-2 (COVID-19): Sample pooling method
Source: PubMed Central journal article supplement (PMC7454965; doi:10.1371/journal.pone.0238417), 2020-08-28
Supplement: pone.0238417.s002.pdf [file pone.0238417.s002.pdf]

S2 Table. Comparison of individual and pooled testing results in different nucleic acid extraction kit<sup>a</sup>.

| Sample ID     | Qiagen DNeasy Blood and Tissue Kit |                     |                           | Geneaid Viral Nucleic Acid Extraction Kit II |                     |                           |
|---------------|------------------------------------|---------------------|---------------------------|----------------------------------------------|---------------------|---------------------------|
|               | Individual <sup>b</sup>            | Pooled <sup>b</sup> | C <sub>T</sub> Difference | Individual <sup>b</sup>                      | Pooled <sup>b</sup> | C <sub>T</sub> Difference |
| H1 (IMU0094)  | 16.44 (0.36)                       | 18.35 (0.41)        | 1.91                      | 16.16 (0.25)                                 | 18.25 (0.19)        | 2.09                      |
| H2 (IMU0093)  | 17.84 (0.24)                       | 18.61 (0.32)        | 0.76                      | 18.56 (0.51)                                 | 19.25 (0.27)        | 0.69                      |
| M1 (IMU0047)  | 21.97 (0.80)                       | 22.85 (1.02)        | 0.88                      | 21.88 (0.76)                                 | 22.83 (0.45)        | 0.96                      |
| M2 (IMU0310)  | 27.13 (0.24)                       | 27.73 (0.94)        | 0.59                      | 25.45 (0.26)                                 | 28.41 (1.09)        | 2.96                      |
| L1 (IMU0254)  | 30.98 (0.60)                       | 31.58 (0.44)        | 0.60                      | 31.10 (0.89)                                 | 31.70 (1.02)        | 0.60                      |
| L2 (IMU0255)  | 34.61 (0.37)                       | 35.40 (0.16)        | 0.79                      | 35.75 (0.36)                                 | 34.95 (0.92)        | 0.80                      |
| Neg (IMU0006) | Not Detected                       | Not Detected        | -                         | Not Detected                                 | Not Detected        | -                         |
| Neg (IMU0203) | Not Detected                       | Not Detected        | -                         | Not Detected                                 | Not Detected        | -                         |
| Neg (IMU0357) | Not Detected                       | Not Detected        | -                         | Not Detected                                 | Not Detected        | -                         |
| Neg (IMU0400) | Not Detected                       | Not Detected        | -                         | Not Detected                                 | Not Detected        | -                         |
| Neg (IMU0498) | Not Detected                       | Not Detected        | -                         | Not Detected                                 | Not Detected        | -                         |
| Neg (IMU0565) | Not Detected                       | Not Detected        | -                         | Not Detected                                 | Not Detected        | -                         |
| Neg (IMU0651) | Not Detected                       | Not Detected        | -                         | Not Detected                                 | Not Detected        | -                         |
| Neg (IMU0708) | Not Detected                       | Not Detected        | -                         | Not Detected                                 | Not Detected        | -                         |
| Neg (IMU0931) | Not Detected                       | Not Detected        | -                         | Not Detected                                 | Not Detected        | -                         |
| Neg (IMU0999) | Not Detected                       | Not Detected        | -                         | Not Detected                                 | Not Detected        | -                         |
| Neg (IMU1109) | Not Detected                       | Not Detected        | -                         | Not Detected                                 | Not Detected        | -                         |
| Neg (IMU1113) | Not Detected                       | Not Detected        | -                         | Not Detected                                 | Not Detected        | -                         |
| Neg (IMU1042) | Not Detected                       | Not Detected        | -                         | Not Detected                                 | Not Detected        | -                         |
| Neg (IMU1274) | Not Detected                       | Not Detected        | -                         | Not Detected                                 | Not Detected        | -                         |

<sup>a</sup> Nucleic acid extraction for each clinical specimen was performed using in both extraction kits according to the respective manufacturer's instructions. The qRT-PCR was performed in triplicates. The C<sub>T</sub> values are expressed as mean (standard deviation).

<sup>b</sup> The volume of clinical specimen used for individual and pooled testing (10-sample pool) were 200 µL and 100 µL, respectively.
