# Supplementary material for: A novel strategy for community screening of SARS-CoV-2 (COVID-19): Sample pooling method
Source: PubMed Central journal article supplement (PMC7454965; doi:10.1371/journal.pone.0238417), 2020-08-28
Supplement: pone.0238417.s003.pdf [file pone.0238417.s003.pdf]

S3 Table. Comparison of individual and pooled testing<sup>b</sup>.

| Detection of Severe Acute Respiratory Syndrome Coronavirus 2 (SARS-CoV-2) by qRT-PCR |             |        |            |      |             |        |            |      |             |        |            |
|--------------------------------------------------------------------------------------|-------------|--------|------------|------|-------------|--------|------------|------|-------------|--------|------------|
| Pool                                                                                 | Specimen ID | Pooled | Individual | Pool | Specimen ID | Pooled | Individual | Pool | Specimen ID | Pooled | Individual |
| 1                                                                                    | IMU1001     | -      | -          | 4    | IMU1031     | -      | -          | 7    | IMU1061     | -      | -          |
|                                                                                      | IMU1002     |        | -          |      | IMU1032     |        | -          |      | IMU1062     |        | -          |
|                                                                                      | IMU1003     |        | -          |      | IMU1033     |        | -          |      | IMU1063     |        | -          |
|                                                                                      | IMU1004     |        | -          |      | IMU1034     |        | -          |      | IMU1064     |        | -          |
|                                                                                      | IMU1005     |        | -          |      | IMU1035     |        | -          |      | IMU1065     |        | -          |
|                                                                                      | IMU1006     |        | -          |      | IMU1036     |        | -          |      | IMU1066     |        | -          |
|                                                                                      | IMU1007     |        | -          |      | IMU1037     |        | -          |      | IMU1067     |        | -          |
|                                                                                      | IMU1008     |        | -          |      | IMU1038     |        | -          |      | IMU1068     |        | -          |
|                                                                                      | IMU1009     |        | -          |      | IMU1039     |        | -          |      | IMU1069     |        | -          |
|                                                                                      | IMU1010     |        | -          |      | IMU1040     |        | -          |      | IMU1070     |        | -          |
| 2                                                                                    | IMU1011     | -      | -          | 5    | IMU1041     | +      | -          | 8    | IMU1071     | -      | -          |
|                                                                                      | IMU1012     |        | -          |      | IMU1042     |        | -          |      | IMU1072     |        | -          |
|                                                                                      | IMU1013     |        | -          |      | IMU1043     |        | -          |      | IMU1073     |        | -          |
|                                                                                      | IMU1014     |        | -          |      | IMU1044     |        | -          |      | IMU1074     |        | -          |
|                                                                                      | IMU1015     |        | -          |      | IMU1045     |        | -          |      | IMU1075     |        | -          |
|                                                                                      | IMU1016     |        | -          |      | IMU1046     |        | -          |      | IMU1076     |        | -          |
|                                                                                      | IMU1017     |        | -          |      | IMU1047     |        | -          |      | IMU1077     |        | -          |
|                                                                                      | IMU1018     |        | -          |      | IMU1048     |        | -          |      | IMU1078     |        | -          |
|                                                                                      | IMU1019     |        | -          |      | Pos. ctrl   |        | +          |      | IMU1079     |        | -          |
|                                                                                      | IMU1020     |        | -          |      | IMU1050     |        | -          |      | IMU1080     |        | -          |
| 3                                                                                    | IMU1021     | -      | -          | 6    | IMU1051     | -      | -          | 9    | IMU1081     | -      | -          |
|                                                                                      | IMU1022     |        | -          |      | IMU1052     |        | -          |      | IMU1082     |        | -          |
|                                                                                      | IMU1023     |        | -          |      | IMU1053     |        | -          |      | IMU1083     |        | -          |
|                                                                                      | IMU1024     |        | -          |      | IMU1054     |        | -          |      | IMU1084     |        | -          |
|                                                                                      | IMU1025     |        | -          |      | IMU1055     |        | -          |      | IMU1085     |        | -          |
|                                                                                      | IMU1026     |        | -          |      | IMU1056     |        | -          |      | IMU1086     |        | -          |
|                                                                                      | IMU1027     |        | -          |      | IMU1057     |        | -          |      | IMU1087     |        | -          |
|                                                                                      | IMU1028     |        | -          |      | IMU1058     |        | -          |      | IMU1088     |        | -          |
|                                                                                      | IMU1029     |        | -          |      | IMU1059     |        | -          |      | IMU1089     |        | -          |
|                                                                                      | IMU1030     |        | -          |      | IMU1060     |        | -          |      | IMU1090     |        | -          |

S3 Table (Cont'd). Comparison of individual and pooled testing<sup>b</sup>.

| Detection of Severe Acute Respiratory Syndrome Coronavirus 2 (SARS-CoV-2) by qRT-PCR |             |        |            |      |             |        |            |      |             |        |            |
|--------------------------------------------------------------------------------------|-------------|--------|------------|------|-------------|--------|------------|------|-------------|--------|------------|
| Pool                                                                                 | Specimen ID | Pooled | Individual | Pool | Specimen ID | Pooled | Individual | Pool | Specimen ID | Pooled | Individual |
| 10                                                                                   | IMU1091     | -      | -          | 13   | IMU1121     | -      | -          | 16   | IMU1151     | -      | -          |
|                                                                                      | IMU1092     |        | -          |      | IMU1122     |        | -          |      | IMU1152     |        | -          |
|                                                                                      | IMU1093     |        | -          |      | IMU1123     |        | -          |      | IMU1153     |        | -          |
|                                                                                      | IMU1094     |        | -          |      | IMU1124     |        | -          |      | IMU1154     |        | -          |
|                                                                                      | IMU1095     |        | -          |      | IMU1125     |        | -          |      | IMU1155     |        | -          |
|                                                                                      | IMU1096     |        | -          |      | IMU1126     |        | -          |      | IMU1156     |        | -          |
|                                                                                      | IMU1097     |        | -          |      | IMU1127     |        | -          |      | IMU1157     |        | -          |
|                                                                                      | IMU1098     |        | -          |      | IMU1128     |        | -          |      | IMU1158     |        | -          |
|                                                                                      | IMU1099     |        | -          |      | IMU1129     |        | -          |      | IMU1159     |        | -          |
|                                                                                      | IMU1100     |        | -          |      | IMU1130     |        | -          |      | IMU1160     |        | -          |
| 11                                                                                   | IMU1101     | +      | -          | 14   | IMU1131     | -      | -          | 17   | IMU1161     | -      | -          |
|                                                                                      | Pos. ctrl   |        | +          |      | IMU1132     |        | -          |      | IMU1162     |        | -          |
|                                                                                      | IMU1103     |        | -          |      | IMU1133     |        | -          |      | IMU1163     |        | -          |
|                                                                                      | IMU1104     |        | -          |      | IMU1134     |        | -          |      | IMU1164     |        | -          |
|                                                                                      | IMU1105     |        | -          |      | IMU1135     |        | -          |      | IMU1165     |        | -          |
|                                                                                      | IMU1106     |        | -          |      | IMU1136     |        | -          |      | IMU1166     |        | -          |
|                                                                                      | IMU1107     |        | -          |      | IMU1137     |        | -          |      | IMU1167     |        | -          |
|                                                                                      | IMU1108     |        | -          |      | IMU1138     |        | -          |      | IMU1168     |        | -          |
|                                                                                      | IMU1109     |        | -          |      | IMU1139     |        | -          |      | IMU1169     |        | -          |
|                                                                                      | IMU1110     |        | -          |      | IMU1140     |        | -          |      | IMU1170     |        | -          |
| 12                                                                                   | IMU1111     | -      | -          | 15   | IMU1141     | -      | -          | 18   | IMU1171     | -      | -          |
|                                                                                      | IMU1112     |        | -          |      | IMU1142     |        | -          |      | IMU1172     |        | -          |
|                                                                                      | IMU1113     |        | -          |      | IMU1143     |        | -          |      | IMU1173     |        | -          |
|                                                                                      | IMU1114     |        | -          |      | IMU1144     |        | -          |      | IMU1174     |        | -          |
|                                                                                      | IMU1115     |        | -          |      | IMU1145     |        | -          |      | IMU1175     |        | -          |
|                                                                                      | IMU1116     |        | -          |      | IMU1146     |        | -          |      | IMU1049     |        | -          |
|                                                                                      | IMU1117     |        | -          |      | IMU1147     |        | -          |      | IMU1102     |        | -          |
|                                                                                      | IMU1118     |        | -          |      | IMU1148     |        | -          |      |             |        |            |
|                                                                                      | IMU1119     |        | -          |      | IMU1149     |        | -          |      |             |        |            |
|                                                                                      | IMU1120     |        | -          |      | IMU1150     |        | -          |      |             |        |            |

<sup>a</sup> The maximum testing capacity for the laboratory was 100 individual specimens per day; Group 1 – 9 were performed in parallel with 89 individual specimens on the first day, and Group 10 – 18 were performed in parallel with 86 individual specimens on the next day (N=175); Internal positive control (Pos. ctrl) was spiked into one of the pool for each day the screening was conducted.

<sup>b</sup> Interpretation of results of individual clinical specimen and pooled specimens on qRT-PCR assays; A pool or sample was considered positive for COVID-19 if the C<sub>T</sub> value was less than or equal to 38. (+) Positive for COVID-19; (-) Negative for COVID-19.
