# Supplementary material for: A novel strategy for community screening of SARS-CoV-2 (COVID-19): Sample pooling method
Source: PubMed Central journal article supplement (PMC7454965; doi:10.1371/journal.pone.0238417), 2020-08-28
Supplement: pone.0238417.s004.pdf [file pone.0238417.s004.pdf]

April 13<sup>th</sup>, 2020. IMU COVID-19 pooled testing results.

| No | Group | Pooled samples (10 specimens), IMU Ref#                                                                                                 | Real-Time RT-PCR result of pooled samples (C <sub>T</sub> value) | Proceed with individual testing |
|----|-------|-----------------------------------------------------------------------------------------------------------------------------------------|------------------------------------------------------------------|---------------------------------|
| 1  | A     | 1001 - 1010                                                                                                                             | Not Detected                                                     | No                              |
| 2  | B     | 1011 - 1020                                                                                                                             | Not Detected                                                     | No                              |
| 3  | C     | 1021 - 1030                                                                                                                             | Not Detected                                                     | No                              |
| 4  | D     | 1031 - 1040                                                                                                                             | Not Detected                                                     | No                              |
| 5  | E     | 1041 – 1050<br>(Exclude sample 1049 due to insufficient specimen volume for pooled testing, replaced with <b>internal +ve control</b> ) | 29.89                                                            | Yes                             |
| 6  | F     | 1051 - 1060                                                                                                                             | Not Detected                                                     | No                              |
| 7  | G     | 1061- 1070                                                                                                                              | Not Detected                                                     | No                              |
| 8  | H     | 1071-1074                                                                                                                               | Not Detected                                                     | No                              |
| 9  |       | 1049                                                                                                                                    | Not Detected                                                     | -                               |

Note: Group H are composed of 4 samples pooled together, **1071 – 1074**.

Group E was spiked with one internal positive control (9 samples + 1 **internal +ve control**).

**Individual testing qRT-PCR results**

| Group E | IMU Ref#                    | C <sub>T</sub> value                     |                                      |
|---------|-----------------------------|------------------------------------------|--------------------------------------|
|         |                             | Pooled testing (1 <sup>st</sup> qRT-PCR) | Individual (2 <sup>nd</sup> qRT-PCR) |
| 1       | 1041                        | 29.89                                    | Not Detected                         |
| 2       | 1042                        |                                          | Not Detected                         |
| 3       | 1043                        |                                          | Not Detected                         |
| 4       | 1044                        |                                          | Not Detected                         |
| 5       | 1045                        |                                          | Not Detected                         |
| 6       | 1046                        |                                          | Not Detected                         |
| 7       | 1047                        |                                          | Not Detected                         |
| 8       | 1048                        |                                          | Not Detected                         |
| 9       | <b>internal +ve control</b> |                                          | 29.16                                |
| 10      | 1050                        | Not Detected                             |                                      |

April 14<sup>th</sup>, 2020. IMU COVID-19 pooled testing results.

| No | Group    | Pooled samples (10 specimens), IMU Ref#                                                                                                 | Real-time RT-PCR result of pooled samples (C <sub>T</sub> value) | Proceed with individual testing |
|----|----------|-----------------------------------------------------------------------------------------------------------------------------------------|------------------------------------------------------------------|---------------------------------|
| 1  | A        | 1075 – 1084                                                                                                                             | Not Detected                                                     | No                              |
| 2  | B        | 1085 – 1094<br>(Exclude sample 1092 due to insufficient specimen volume for pooled testing, replaced with <b>sample 1175</b> )          | Not Detected                                                     | No                              |
| 3  | <b>C</b> | 1095 – 1104<br>(Exclude sample 1102 due to insufficient specimen volume for pooled testing, replaced with <b>internal +ve control</b> ) | <b>30.18</b>                                                     | <b>Yes</b>                      |
| 4  | D        | 1005 – 1114                                                                                                                             | Not Detected                                                     | No                              |
| 5  | E        | 1115 – 1124                                                                                                                             | Not Detected                                                     | No                              |
| 6  | F        | 1125 – 1134                                                                                                                             | Not Detected                                                     | No                              |
| 7  | G        | 1135 – 1144                                                                                                                             | Not Detected                                                     | No                              |
| 8  | H        | 1145 – 1154                                                                                                                             | Not Detected                                                     | No                              |
| 9  | I        | 1155 – 1164                                                                                                                             | Not Detected                                                     | No                              |
| 10 | J        | 1165 – 1174                                                                                                                             | Not Detected                                                     | No                              |
| 11 |          | 1092                                                                                                                                    | Not Detected                                                     | No                              |
| 12 |          | 1102                                                                                                                                    | Not Detected                                                     | No                              |

Note: **Group C** was spiked with one internal positive control (9 samples + 1 **internal +ve control**).

**Individual testing qRT-PCR results**

| Group C | IMU Ref#                    | C <sub>T</sub> value                     |                                      |
|---------|-----------------------------|------------------------------------------|--------------------------------------|
|         |                             | Pooled testing (1 <sup>st</sup> qRT-PCR) | Individual (2 <sup>nd</sup> qRT-PCR) |
| 1       | 1095                        | <b>30.18</b>                             | Not Detected                         |
| 2       | 1096                        |                                          | Not Detected                         |
| 3       | 1097                        |                                          | Not Detected                         |
| 4       | 1098                        |                                          | Not Detected                         |
| 5       | 1099                        |                                          | Not Detected                         |
| 6       | 1100                        |                                          | Not Detected                         |
| 7       | 1101                        |                                          | Not Detected                         |
| 8       | <b>internal +ve control</b> |                                          | <b>29.07</b>                         |
| 9       | 1103                        |                                          | Not Detected                         |
| 10      | 1104                        |                                          | Not Detected                         |

April 15<sup>th</sup>, 2020. IMU COVID-19 pooled testing results.

| No | Group | Pooled samples (10 specimens), IMU Ref#                                                                 | Real-time RT-PCR result of pooled samples (C <sub>T</sub> value) | Proceed with individual testing |
|----|-------|---------------------------------------------------------------------------------------------------------|------------------------------------------------------------------|---------------------------------|
| 1  | A     | 1176 – 1185                                                                                             | Not Detected                                                     | No                              |
| 2  | B     | 1186 – 1195                                                                                             | Not Detected                                                     | No                              |
| 3  | C     | 1196 – 1205                                                                                             | Not Detected                                                     | No                              |
| 4  | D     | 1206 – 1215                                                                                             | Not Detected                                                     | No                              |
| 5  | E     | 1216 – 1225                                                                                             | Not Detected                                                     | No                              |
| 6  | F     | 1226 – 1235                                                                                             | Not Detected                                                     | No                              |
| 7  | G     | 1236 – 1245                                                                                             | Not Detected                                                     | No                              |
| 8  | H     | 1246 – 1255                                                                                             | Not Detected                                                     | No                              |
| 9  | I     | 1256 – 1265                                                                                             | Not Detected                                                     | No                              |
| 10 | J     | 1266 – 1274<br>(Sample 1275 was extracted individually, and replaced with <b>internal +ve control</b> ) | 29.55                                                            | Yes                             |
| 11 |       | 1275                                                                                                    | Not Detected                                                     | -                               |

Note: **Group J** was spiked with one internal positive control (9 samples + 1 **internal +ve control**).

Individual testing qRT-PCR results

| Group J | IMU Ref#                    | C <sub>T</sub> value                     |                                      |
|---------|-----------------------------|------------------------------------------|--------------------------------------|
|         |                             | Pooled testing (1 <sup>st</sup> qRT-PCR) | Individual (2 <sup>nd</sup> qRT-PCR) |
| 1       | 1266                        | 29.55                                    | Not Detected                         |
| 2       | 1267                        |                                          | Not Detected                         |
| 3       | 1268                        |                                          | Not Detected                         |
| 4       | 1269                        |                                          | Not Detected                         |
| 5       | 1270                        |                                          | Not Detected                         |
| 6       | 1271                        |                                          | Not Detected                         |
| 7       | 1272                        |                                          | Not Detected                         |
| 8       | 1273                        |                                          | Not Detected                         |
| 9       | 1274                        |                                          | Not Detected                         |
| 10      | <b>internal +ve control</b> |                                          | 30.54                                |

April 16<sup>th</sup>, 2020. IMU COVID-19 pooled testing results.

| No | Group | Pooled samples (10 specimens), IMU Ref#                         | Real-time RT-PCR result of pooled samples (C <sub>T</sub> value) | Proceed with individual testing |
|----|-------|-----------------------------------------------------------------|------------------------------------------------------------------|---------------------------------|
| 1  | A     | 1276 – 1285                                                     | Not Detected                                                     | No                              |
| 2  | B     | 1286 – 1295                                                     | Not Detected                                                     | No                              |
| 3  | C     | 1296 – 1305                                                     | 25.39                                                            | Yes                             |
| 4  | D     | 1306 – 1315                                                     | Not Detected                                                     | No                              |
| 5  | E     | 1316 – 1325                                                     | Not Detected                                                     | No                              |
| 6  | F     | 1327 – 1336                                                     | Not Detected                                                     | No                              |
| 7  | G     | 1337 – 1346                                                     | Not Detected                                                     | No                              |
| 8  | H     | 1347 – 1356                                                     | Not Detected                                                     | No                              |
| 9  | I     | 1357 – 1366                                                     | Not Detected                                                     | No                              |
| 10 | J     | 1367, 1368, 1369, 1370, 1371, 1372                              | Not Detected                                                     | No                              |
| 11 | K     | 1373, 1374, 1375, 1376, 1377, 1326, <b>internal +ve control</b> | 28.86                                                            | Yes                             |

Note: **Group K** was spiked with one internal positive control (6 samples + 1 **internal +ve control**). Sigmoidal curve with C<sub>T</sub> value was observed for Group C.

**Individual testing qRT-PCR results**

| Group C | IMU Ref# | C <sub>T</sub> value                     |                                      |
|---------|----------|------------------------------------------|--------------------------------------|
|         |          | Pooled testing (1 <sup>st</sup> qRT-PCR) | Individual (2 <sup>nd</sup> qRT-PCR) |
| 1       | 1296     | 25.39                                    | Not Detected                         |
| 2       | 1297     |                                          | Not Detected                         |
| 3       | 1298     |                                          | 24.98                                |
| 4       | 1299     |                                          | Not Detected                         |
| 5       | 1300     |                                          | Not Detected                         |
| 6       | 1301     |                                          | Not Detected                         |
| 7       | 1302     |                                          | Not Detected                         |
| 8       | 1303     |                                          | Not Detected                         |
| 9       | 1304     |                                          | Not Detected                         |
| 10      | 1305     |                                          | Not Detected                         |

| Group K | IMU Ref#                    | C <sub>T</sub> value                     |                                      |
|---------|-----------------------------|------------------------------------------|--------------------------------------|
|         |                             | Pooled testing (1 <sup>st</sup> qRT-PCR) | Individual (2 <sup>nd</sup> qRT-PCR) |
| 1       | 1373                        | 28.86                                    | Not Detected                         |
| 2       | 1374                        |                                          | Not Detected                         |
| 3       | 1375                        |                                          | Not Detected                         |
| 4       | 1376                        |                                          | Not Detected                         |
| 5       | 1377                        |                                          | Not Detected                         |
| 6       | 1326                        |                                          | Not Detected                         |
| 7       | <b>internal +ve control</b> |                                          | 28.47                                |

April 17<sup>th</sup>, 2020. IMU COVID-19 pooled testing results.

| No | Group | Pooled samples (10 specimens),<br>IMU Ref#                | Real-time RT-PCR result of<br>pooled samples (C <sub>T</sub> value) | Proceed with individual<br>testing |
|----|-------|-----------------------------------------------------------|---------------------------------------------------------------------|------------------------------------|
| 1  | A     | 1276 – 1285                                               | Not Detected                                                        | No                                 |
| 2  | B     | 1286 – 1295                                               | Not Detected                                                        | No                                 |
| 3  | C     | 1296 – 1305                                               | Not Detected                                                        | No                                 |
| 4  | D     | 1306 – 1315                                               | Not Detected                                                        | No                                 |
| 5  | E     | 1316 – 1325                                               | Not Detected                                                        | No                                 |
| 6  | F     | 1327 – 1336                                               | Not Detected                                                        | No                                 |
| 7  | G     | 1337 – 1346                                               | Not Detected                                                        | No                                 |
| 8  | H     | 1347 – 1356                                               | Not Detected                                                        | No                                 |
| 9  | I     | 1458 – 1466<br>(9 samples + <i>internal +ve control</i> ) | 23.71                                                               | Yes                                |
| 10 | J     | 1467 – 1471                                               | 40.16                                                               | Yes                                |
| 11 | K     | 1472 – 1477                                               | Not Detected                                                        | No                                 |

Note: **Group I** was spiked with one internal positive control (9 samples + 1 *internal +ve control*). A C<sub>T</sub> value of **40.16** was obtained for **Group J**, but no sigmoidal curve was observed. Nevertheless, we proceeded with individual testing to ensure the specimen was true negative.

Individual testing qRT-PCR results

| Group I | IMU Ref#                    | C <sub>T</sub> value                        |                                         |
|---------|-----------------------------|---------------------------------------------|-----------------------------------------|
|         |                             | Pooled testing<br>(1 <sup>st</sup> qRT-PCR) | Individual<br>(2 <sup>nd</sup> qRT-PCR) |
| 1       | 1458                        | 23.71                                       | Not Detected                            |
| 2       | 1459                        |                                             | Not Detected                            |
| 3       | 1460                        |                                             | Not Detected                            |
| 4       | 1461                        |                                             | Not Detected                            |
| 5       | 1462                        |                                             | Not Detected                            |
| 6       | 1463                        |                                             | Not Detected                            |
| 7       | 1464                        |                                             | Not Detected                            |
| 8       | 1465                        |                                             | Not Detected                            |
| 9       | 1466                        |                                             | Not Detected                            |
| 10      | <i>internal +ve control</i> |                                             | 23.23                                   |

| Group J | IMU Ref# | C <sub>T</sub> value                        |                                         |
|---------|----------|---------------------------------------------|-----------------------------------------|
|         |          | Pooled testing<br>(1 <sup>st</sup> qRT-PCR) | Individual<br>(2 <sup>nd</sup> qRT-PCR) |
| 1       | 1467     | 40.16                                       | Not Detected                            |
| 2       | 1468     |                                             | Not Detected                            |
| 3       | 1469     |                                             | Not Detected                            |
| 4       | 1470     |                                             | Not Detected                            |
| 5       | 1471     |                                             | Not Detected                            |

April 18<sup>th</sup>, 2020. IMU COVID-19 pooled testing results.

| No | Group | Pooled samples (10 samples),<br>IMU Ref#                  | Real-Time RT-PCR result of<br>pooled samples ( $C_T$ value) | Proceed with individual<br>testing |
|----|-------|-----------------------------------------------------------|-------------------------------------------------------------|------------------------------------|
| 1  | A     | 1478 – 1487                                               | 30.61                                                       | Yes                                |
| 2  | B     | 1488 – 1497                                               | 20.50                                                       | Yes                                |
| 3  | C     | 1498 – 1507                                               | 22.97                                                       | Yes                                |
| 4  | D     | 1508 – 1517                                               | 24.85                                                       | Yes                                |
| 5  | E     | 1518 – 1527                                               | 26.60                                                       | Yes                                |
| 6  | F     | 1528 – 1537                                               | 21.11                                                       | Yes                                |
| 7  | G     | 1538 – 1547                                               | 24.85                                                       | Yes                                |
| 8  | H     | 1548 – 1557                                               | Not Detected                                                | No                                 |
| 9  | I     | 1558 – 1567                                               | Not Detected                                                | No                                 |
| 10 | J     | 1568 – 1577                                               | Not Detected                                                | No                                 |
| 11 | K     | 1578 – 1587                                               | 35.72                                                       | Yes                                |
| 12 | L     | 1588 – 1596<br>(9 samples + <i>internal +ve control</i> ) | 26.48                                                       | Yes                                |
| 13 | M     | 1597 – 1605                                               | 19.94                                                       | Yes                                |

Note: **Group L** was spiked with one internal positive control (9 samples + 1 *internal +ve control*). Sigmoidal curve with  $C_T$  value was obtained for Group A, B, C, D, E, F, G, K, L, M (total of 10 groups). Proceeded with individual testing and qRT-PCR assay was repeated for these specimens.

**Individual testing qRT-PCR results**

Please refer to next page.

| Group | No. | IMU Ref# | Pooled testing (1 <sup>st</sup> qRT-PCR) | Individual (2 <sup>nd</sup> qRT-PCR) | Group | No. | IMU Ref#          | Pooled testing (1 <sup>st</sup> qRT-PCR) | Individual (2 <sup>nd</sup> qRT-PCR) |
|-------|-----|----------|------------------------------------------|--------------------------------------|-------|-----|-------------------|------------------------------------------|--------------------------------------|
| A     | 1   | 1478     | 30.61                                    | Not Detected                         | F     | 51  | 1528              | 23.71                                    | Not Detected                         |
|       | 2   | 1479     |                                          | Not Detected                         |       | 52  | 1529              |                                          | 22.83                                |
|       | 3   | 1480     |                                          | Not Detected                         |       | 53  | 1530              |                                          | Not Detected                         |
|       | 4   | 1481     |                                          | Not Detected                         |       | 54  | 1531              |                                          | Not Detected                         |
|       | 5   | 1482     |                                          | Not Detected                         |       | 55  | 1532              |                                          | Not Detected                         |
|       | 6   | 1483     |                                          | 29.42                                |       | 56  | 1533              |                                          | Not Detected                         |
|       | 7   | 1484     |                                          | Not Detected                         |       | 57  | 1534              |                                          | Not Detected                         |
|       | 8   | 1485     |                                          | Not Detected                         |       | 58  | 1535              |                                          | 22.12                                |
|       | 9   | 1486     |                                          | Not Detected                         |       | 59  | 1536              |                                          | 33.12                                |
|       | 10  | 1487     |                                          | 30.03                                |       | 60  | 1537              |                                          | 29.76                                |
| B     | 11  | 1488     | 20.50                                    | Not Detected                         | G     | 61  | 1538              | 24.85                                    | 30.01                                |
|       | 12  | 1489     |                                          | Not Detected                         |       | 62  | 1539              |                                          | Not Detected                         |
|       | 13  | 1490     |                                          | Not Detected                         |       | 63  | 1540              |                                          | Not Detected                         |
|       | 14  | 1491     |                                          | Not Detected                         |       | 64  | 1541              |                                          | 23.32                                |
|       | 15  | 1492     |                                          | 24.25                                |       | 65  | 1542              |                                          | Not Detected                         |
|       | 16  | 1493     |                                          | Not Detected                         |       | 66  | 1543              |                                          | Not Detected                         |
|       | 17  | 1494     |                                          | 16.74                                |       | 67  | 1544              |                                          | 33.93                                |
|       | 18  | 1495     |                                          | Not Detected                         |       | 68  | 1545              |                                          | Not Detected                         |
|       | 19  | 1496     |                                          | Not Detected                         |       | 69  | 1546              |                                          | Not Detected                         |
|       | 20  | 1497     |                                          | Not Detected                         |       | 70  | 1547              |                                          | 30.42                                |
| C     | 21  | 1498     | 22.97                                    | Not Detected                         | K     | 71  | 1578              | 35.72                                    | Not Detected                         |
|       | 22  | 1499     |                                          | Not Detected                         |       | 72  | 1579              |                                          | Not Detected                         |
|       | 23  | 1500     |                                          | 26.34                                |       | 73  | 1580              |                                          | Not Detected                         |
|       | 24  | 1501     |                                          | 20.02                                |       | 74  | 1581              |                                          | Not Detected                         |
|       | 25  | 1502     |                                          | Not Detected                         |       | 75  | 1582              |                                          | Not Detected                         |
|       | 26  | 1503     |                                          | Not Detected                         |       | 76  | 1583              |                                          | Not Detected                         |
|       | 27  | 1504     |                                          | Not Detected                         |       | 77  | 1584              |                                          | Not Detected                         |
|       | 28  | 1505     |                                          | 30.08                                |       | 78  | 1585              |                                          | Not Detected                         |
|       | 29  | 1506     |                                          | Not Detected                         |       | 79  | 1586              |                                          | 31.61                                |
|       | 30  | 1507     |                                          | 27.03                                |       | 80  | 1587              |                                          | Not Detected                         |
| D     | 31  | 1508     | 24.85                                    | 23.79                                | L     | 81  | 1588              | 26.48                                    | Not Detected                         |
|       | 32  | 1509     |                                          | Not Detected                         |       | 82  | 1589              |                                          | 32.91                                |
|       | 33  | 1510     |                                          | 29.13                                |       | 83  | 1590              |                                          | Not Detected                         |
|       | 34  | 1511     |                                          | Not Detected                         |       | 84  | 1591              |                                          | Not Detected                         |
|       | 35  | 1512     |                                          | 23.47                                |       | 85  | 1592              |                                          | Not Detected                         |
|       | 36  | 1513     |                                          | Not Detected                         |       | 86  | 1593              |                                          | Not Detected                         |
|       | 37  | 1514     |                                          | 30.54                                |       | 87  | 1594              |                                          | Not Detected                         |
|       | 38  | 1515     |                                          | 32.13                                |       | 88  | 1595              |                                          | Not Detected                         |
|       | 39  | 1516     |                                          | Not Detected                         |       | 89  | 1596              |                                          | Not Detected                         |
|       | 40  | 1517     |                                          | Not Detected                         |       | 90  | internal +ve ctrl |                                          | 23.04                                |
| E     | 41  | 1518     | 26.60                                    | 33.56                                | M     | 91  | 1597              | 19.94                                    | 29.11                                |
|       | 42  | 1519     |                                          | Not Detected                         |       | 92  | 1598              |                                          | 19.03                                |
|       | 43  | 1520     |                                          | 23.81                                |       | 93  | 1599              |                                          | 28.04                                |
|       | 44  | 1521     |                                          | Not Detected                         |       | 94  | 1600              |                                          | Not Detected                         |
|       | 45  | 1522     |                                          | Not Detected                         |       | 95  | 1601              |                                          | Not Detected                         |
|       | 46  | 1523     |                                          | 28.79                                |       | 96  | 1602              |                                          | 30.40                                |
|       | 47  | 1524     |                                          | Not Detected                         |       | 97  | 1603              |                                          | 34.79                                |
|       | 48  | 1525     |                                          | 36.14                                |       | 98  | 1604              |                                          | Not Detected                         |
|       | 49  | 1526     |                                          | 23.49                                |       | 99  | 1605              |                                          | 28.89                                |
|       | 50  | 1527     |                                          | Not Detected                         |       |     |                   |                                          |                                      |

April 19<sup>th</sup>, 2020. IMU COVID-19 pooled testing results

| Group | Pooled samples (5 specimens), IMU Ref#                    | Real-Time RT-PCR result of pooled samples (C <sub>T</sub> value) | Proceed with individual testing |
|-------|-----------------------------------------------------------|------------------------------------------------------------------|---------------------------------|
| 1     | 1606 – 1610                                               | Not Detected                                                     | No                              |
| 2     | 1611 – 1615                                               | Not Detected                                                     | No                              |
| 3     | 1616 – 1620                                               | Not Detected                                                     | No                              |
| 4     | 1621 – 1625                                               | Not Detected                                                     | No                              |
| 5     | 1626 – 1630                                               | Not Detected                                                     | No                              |
| 6     | 1631 – 1635                                               | Not Detected                                                     | No                              |
| 7     | 1636 – 1640                                               | Not Detected                                                     | No                              |
| 8     | 1641 – 1645                                               | Not Detected                                                     | No                              |
| 9     | 1646 – 1650                                               | Not Detected                                                     | No                              |
| 10    | 1651 – 1655                                               | Not Detected                                                     | No                              |
| 11    | 1656 – 1660                                               | Not Detected                                                     | No                              |
| 12    | 1661 – 1665                                               | Not Detected                                                     | No                              |
| 13    | 1666 – 1670                                               | Not Detected                                                     | No                              |
| 14    | 1671 – 1675                                               | Not Detected                                                     | No                              |
| 15    | 1676 – 1680                                               | Not Detected                                                     | No                              |
| 16    | 1681 – 1685                                               | Not Detected                                                     | No                              |
| 17    | 1686 – 1690                                               | Not Detected                                                     | No                              |
| 18    | 1691 – 1695                                               | Not Detected                                                     | No                              |
| 19    | 1696 – 1700                                               | Not Detected                                                     | No                              |
| 20    | 1701 – 1705                                               | Not Detected                                                     | No                              |
| 21    | 1706 – 1710                                               | Not Detected                                                     | No                              |
| 22    | 1711 – 1715                                               | Not Detected                                                     | No                              |
| 23    | 1716 – 1720                                               | Not Detected                                                     | No                              |
| 24    | 1726 – 1725                                               | Not Detected                                                     | No                              |
| 25    | 1726 – 1730                                               | Not Detected                                                     | No                              |
| 26    | 1731 – 1735                                               | Not Detected                                                     | No                              |
| 27    | 1736 – 1740                                               | Not Detected                                                     | No                              |
| 28    | 1741 – 1744<br>(4 samples + <i>internal +ve control</i> ) | 22.08                                                            | Yes                             |

Note: **Group 28** was spiked with one internal positive control (4 specimens + 1 *internal +ve control*).

**Individual testing qRT-PCR results**

| Group 28 | IMU Ref#                    | C <sub>T</sub> value                     |                                      |
|----------|-----------------------------|------------------------------------------|--------------------------------------|
|          |                             | Pooled testing (1 <sup>st</sup> qRT-PCR) | Individual (2 <sup>nd</sup> qRT-PCR) |
| 1        | 1741                        | 22.08                                    | Not Detected                         |
| 2        | 1742                        |                                          | Not Detected                         |
| 3        | 1743                        |                                          | Not Detected                         |
| 4        | 1744                        |                                          | Not Detected                         |
| 5        | <i>internal +ve control</i> |                                          | 22.32                                |



## April 21<sup>st</sup>, 2020. IMU COVID-19 pooled testing results

| No | Group | Pooled samples (10 samples),<br>IMU Ref#                  | Real-Time RT-PCR result of<br>pooled samples (C <sub>T</sub> value) | Proceed with individual<br>testing |
|----|-------|-----------------------------------------------------------|---------------------------------------------------------------------|------------------------------------|
| 1  | A     | 1745 – 1754                                               | Not Detected                                                        | No                                 |
| 2  | B     | 1755 – 1764                                               | Not Detected                                                        | No                                 |
| 3  | C     | 1765 – 1774                                               | Not Detected                                                        | No                                 |
| 4  | D     | 1775 – 1784                                               | Not Detected                                                        | No                                 |
| 5  | E     | 1785 – 1794                                               | Not Detected                                                        | No                                 |
| 6  | F     | 1795 – 1799 (5 samples)                                   | Not Detected                                                        | No                                 |
| 7  | G     | 1800 – 1809                                               | Not Detected                                                        | No                                 |
| 8  | H     | 1810 – 1819                                               | Not Detected                                                        | No                                 |
| 9  | I     | 1820 – 1829                                               | Not Detected                                                        | No                                 |
| 10 | J     | 1830 – 1839                                               | Not Detected                                                        | No                                 |
| 11 | K     | 1840 – 1849                                               | Not Detected                                                        | No                                 |
| 12 | L     | 1850 – 1854 (5 samples +<br><i>internal +ve control</i> ) | 20.48                                                               | Yes                                |
|    |       | <i>External +ve control</i>                               | 28.34                                                               | -                                  |

Note: **Group F** was a pooled sample with 5 samples (1795 – 1799). **Group L** was spiked with one internal positive control (5 samples + 1 *internal +ve control*).

### Individual testing qRT-PCR results

| Group L | IMU Ref#                    | C <sub>T</sub> value                        |                                         |
|---------|-----------------------------|---------------------------------------------|-----------------------------------------|
|         |                             | Pooled testing<br>(1 <sup>st</sup> qRT-PCR) | Individual<br>(2 <sup>nd</sup> qRT-PCR) |
| 1       | 1850                        | 20.48                                       | Not Detected                            |
| 2       | 1851                        |                                             | Not Detected                            |
| 3       | 1852                        |                                             | Not Detected                            |
| 4       | 1853                        |                                             | Not Detected                            |
| 5       | 1854                        |                                             | Not Detected                            |
| 6       | <i>internal +ve control</i> |                                             | 20.34                                   |

April 22<sup>nd</sup>, 2020. IMU COVID-19 pooled testing results

| Group     | Pooled samples (10 samples), IMU Ref#                     | Real-Time RT-PCR result of pooled samples (C <sub>T</sub> value) | Proceed with individual testing |
|-----------|-----------------------------------------------------------|------------------------------------------------------------------|---------------------------------|
| 1         | 1855 - 1863                                               | Not Detected                                                     | No                              |
| 2         | 1865 - 1874                                               | Not Detected                                                     | No                              |
| 3         | 1875 - 1884                                               | Not Detected                                                     | No                              |
| 4         | 1885 - 1894                                               | Not Detected                                                     | No                              |
| 5         | 1895 - 1904                                               | Not Detected                                                     | No                              |
| 6         | 1905 - 1914                                               | Not Detected                                                     | No                              |
| 7         | 1915 - 1924                                               | Not Detected                                                     | No                              |
| 8         | 1925 - 1934                                               | Not Detected                                                     | No                              |
| 9         | 1935 - 1944                                               | Not Detected                                                     | No                              |
| 10        | 1945 - 1954                                               | Not Detected                                                     | No                              |
| 11        | 1955 - 1964                                               | Not Detected                                                     | No                              |
| 12        | 1965 - 1974                                               | Not Detected                                                     | No                              |
| 13        | 1975 - 1984                                               | Not Detected                                                     | No                              |
| 14        | 1985 - 1994                                               | Not Detected                                                     | No                              |
| 15        | 1995 - 2004                                               | Not Detected                                                     | No                              |
| 16        | 2005 - 2014                                               | Not Detected                                                     | No                              |
| 17        | 2015 - 2024                                               | Not Detected                                                     | No                              |
| 18        | 2025 - 2034                                               | Not Detected                                                     | No                              |
| 19        | 2035 - 2044                                               | Not Detected                                                     | No                              |
| 20        | 2045 - 2054                                               | Not Detected                                                     | No                              |
| 21        | 2055 - 2064                                               | Not Detected                                                     | No                              |
| 22        | 2065 - 2074                                               | Not Detected                                                     | No                              |
| <b>23</b> | 2075 - 2083<br>(9 samples + <b>internal +ve control</b> ) | <b>21.45</b>                                                     | <b>Yes</b>                      |

Note: **Group 23** was spiked with one internal positive control (9 samples + 1 **internal +ve control**).

Individual testing qRT-PCR results

| Group 23 | IMU Ref#                    | C <sub>T</sub> value                     |                                      |
|----------|-----------------------------|------------------------------------------|--------------------------------------|
|          |                             | Pooled testing (1 <sup>st</sup> qRT-PCR) | Individual (2 <sup>nd</sup> qRT-PCR) |
| 1        | 2075                        | <b>21.45</b>                             | Not Detected                         |
| 2        | 2076                        |                                          | Not Detected                         |
| 3        | 2077                        |                                          | Not Detected                         |
| 4        | 2078                        |                                          | Not Detected                         |
| 5        | 2079                        |                                          | Not Detected                         |
| 6        | 2080                        |                                          | Not Detected                         |
| 7        | 2081                        |                                          | Not Detected                         |
| 8        | 2082                        |                                          | Not Detected                         |
| 9        | 2083                        |                                          | Not Detected                         |
| 10       | <b>internal +ve control</b> |                                          | <b>21.07</b>                         |

April 23<sup>rd</sup>, 2020. IMU COVID-19 pooled testing results.

| No | Group    | Pooled samples (10 samples),<br>IMU Ref#                  | Real-Time RT-PCR result of<br>pooled samples (C <sub>T</sub> value) | Proceed with individual<br>testing |
|----|----------|-----------------------------------------------------------|---------------------------------------------------------------------|------------------------------------|
| 1  | A        | 2084 – 2093                                               | Not Detected                                                        | No                                 |
| 2  | B        | 2094 – 2103                                               | Not Detected                                                        | No                                 |
| 3  | C        | 2104 – 2113                                               | Not Detected                                                        | No                                 |
| 4  | D        | 2114 – 2123                                               | Not Detected                                                        | No                                 |
| 5  | E        | 2124 – 2133                                               | Not Detected                                                        | No                                 |
| 6  | F        | 2134 – 2143                                               | Not Detected                                                        | No                                 |
| 7  | G        | 2144 – 2153                                               | Not Detected                                                        | No                                 |
| 8  | H        | 2154 – 2163                                               | Not Detected                                                        | No                                 |
| 9  | I        | 2164 – 2173                                               | Not Detected                                                        | No                                 |
| 10 | J        | 2174 – 2183                                               | Not Detected                                                        | No                                 |
| 11 | K        | 2184 – 2193                                               | Not Detected                                                        | No                                 |
| 12 | L        | 2194 – 2203                                               | Not Detected                                                        | No                                 |
| 13 | M        | 2204 – 2213                                               | Not Detected                                                        | No                                 |
| 14 | <b>N</b> | 2214 – 2222<br>(9 samples + <b>internal +ve control</b> ) | <b>20.92</b>                                                        | <b>Yes</b>                         |
| 15 | O        | 2223 – 2232                                               | Not Detected                                                        | No                                 |
| 16 | <b>P</b> | 2233 + <b>external +ve control</b>                        | <b>27.56</b>                                                        | <b>Yes</b>                         |

Note: **Group N** was spiked with one internal positive control (9 samples + 1 **internal +ve control**). **Group P** was spiked with one external positive control (1 sample + 1 **external +ve control**)

**Individual testing qRT-PCR results**

| Group N | IMU Ref#                    | C <sub>T</sub> value                        |                                         |
|---------|-----------------------------|---------------------------------------------|-----------------------------------------|
|         |                             | Pooled testing<br>(1 <sup>st</sup> qRT-PCR) | Individual<br>(2 <sup>nd</sup> qRT-PCR) |
| 1       | 2214                        | <b>20.92</b>                                | Not Detected                            |
| 2       | 2215                        |                                             | Not Detected                            |
| 3       | 2216                        |                                             | Not Detected                            |
| 4       | 2217                        |                                             | Not Detected                            |
| 5       | 2218                        |                                             | Not Detected                            |
| 6       | 2219                        |                                             | Not Detected                            |
| 7       | 2220                        |                                             | Not Detected                            |
| 8       | 2221                        |                                             | Not Detected                            |
| 9       | 2222                        |                                             | Not Detected                            |
| 10      | <b>internal +ve control</b> |                                             | <b>20.99</b>                            |

| Group P | IMU Ref#                    | C <sub>T</sub> value                        |                                             |
|---------|-----------------------------|---------------------------------------------|---------------------------------------------|
|         |                             | Pooled testing<br>(1 <sup>st</sup> qRT-PCR) | Pooled testing<br>(1 <sup>st</sup> qRT-PCR) |
| 1       | 2233                        | <b>27.56</b>                                | Not Detected                                |
| 2       | <b>external +ve control</b> |                                             | <b>27.32</b>                                |

April 24<sup>th</sup>, 2020. IMU COVID-19 pooled testing results.

| No | Group | Pooled samples (10 samples),<br>IMU Ref#                  | Real-Time RT-PCR result of<br>pooled samples (C <sub>T</sub> value) | Proceed with individual<br>testing |
|----|-------|-----------------------------------------------------------|---------------------------------------------------------------------|------------------------------------|
| 1  | A     | 2234 – 2243                                               | Not Detected                                                        | No                                 |
| 2  | B     | 2244 – 2253                                               | Not Detected                                                        | No                                 |
| 3  | C     | 2254 – 2263                                               | Not Detected                                                        | No                                 |
| 4  | D     | 2264 – 2273                                               | Not Detected                                                        | No                                 |
| 5  | E     | 2274 – 2283                                               | Not Detected                                                        | No                                 |
| 6  | F     | 2284 – 2293                                               | Not Detected                                                        | No                                 |
| 7  | G     | 2294 – 2303                                               | Not Detected                                                        | No                                 |
| 8  | H     | 2304 – 2313                                               | Not Detected                                                        | No                                 |
| 9  | I     | 2314 – 2323                                               | Not Detected                                                        | No                                 |
| 10 | J     | 2324 – 2333                                               | Not Detected                                                        | No                                 |
| 11 | K     | 2334 – 2343                                               | Not Detected                                                        | No                                 |
| 12 | L     | 2344 – 2353                                               | Not Detected                                                        | No                                 |
| 13 | M     | 2354 – 2363                                               | Not Detected                                                        | No                                 |
| 14 | N     | 2364 – 2373                                               | Not Detected                                                        | No                                 |
| 15 | O     | 2374 – 2383                                               | Not Detected                                                        | No                                 |
| 16 | P     | 2384 – 2392<br>(9 samples + <i>internal +ve control</i> ) | 21.22                                                               | Yes                                |
| 17 | Q     | 2393 + <i>external +ve control</i>                        | 28.01                                                               | Yes                                |

Note: **Group P** was spiked with one internal positive control (9 samples + 1 *internal +ve control*). **Group Q** was spiked with one external positive control (1 sample + 1 *external +ve control*)

**Individual testing qRT-PCR results**

| Group P | IMU Ref#                    | C <sub>T</sub> value                        |                                         |
|---------|-----------------------------|---------------------------------------------|-----------------------------------------|
|         |                             | Pooled testing<br>(1 <sup>st</sup> qRT-PCR) | Individual<br>(2 <sup>nd</sup> qRT-PCR) |
| 1       | 2384                        | 21.22                                       | Not Detected                            |
| 2       | 2385                        |                                             | Not Detected                            |
| 3       | 2386                        |                                             | Not Detected                            |
| 4       | 2387                        |                                             | Not Detected                            |
| 5       | 2388                        |                                             | Not Detected                            |
| 6       | 2389                        |                                             | Not Detected                            |
| 7       | 2390                        |                                             | Not Detected                            |
| 8       | 2391                        |                                             | Not Detected                            |
| 9       | 2392                        |                                             | Not Detected                            |
| 10      | <i>internal +ve control</i> |                                             | 21.38                                   |

| Group Q | IMU Ref#                    | C <sub>T</sub> value                        |                                         |
|---------|-----------------------------|---------------------------------------------|-----------------------------------------|
|         |                             | Pooled testing<br>(1 <sup>st</sup> qRT-PCR) | Individual<br>(2 <sup>nd</sup> qRT-PCR) |
| 1       | 2393                        | 28.01                                       | Not Detected                            |
| 2       | <i>external +ve control</i> |                                             | 27.32                                   |

April 25<sup>th</sup>, 2020. IMU COVID-19 pooled testing results.

| No | Group | Pooled samples (10 samples),<br>IMU Ref#                  | Real-Time RT-PCR result of<br>pooled samples (C <sub>T</sub> value) | Proceed with individual<br>testing |
|----|-------|-----------------------------------------------------------|---------------------------------------------------------------------|------------------------------------|
| 1  | A     | 2394 – 2403                                               | Not Detected                                                        | No                                 |
| 2  | B     | 2404 – 2413                                               | Not Detected                                                        | No                                 |
| 3  | C     | 2414 – 2423                                               | Not Detected                                                        | No                                 |
| 4  | D     | 2424 – 2433                                               | Not Detected                                                        | No                                 |
| 5  | E     | 2434 – 2443                                               | Not Detected                                                        | No                                 |
| 6  | F     | 2444 – 2453                                               | Not Detected                                                        | No                                 |
| 7  | G     | 2454 – 2463                                               | Not Detected                                                        | No                                 |
| 8  | H     | 2464 – 2473                                               | Not Detected                                                        | No                                 |
| 9  | I     | 2474 – 2483                                               | Not Detected                                                        | No                                 |
| 10 | J     | 2484 – 2493                                               | Not Detected                                                        | No                                 |
| 11 | K     | 2494 – 2503                                               | Not Detected                                                        | No                                 |
| 12 | L     | 2504 – 2513                                               | Not Detected                                                        | No                                 |
| 13 | M     | 2514 – 2523                                               | Not Detected                                                        | No                                 |
| 14 | N     | 2524 – 2533                                               | Not Detected                                                        | No                                 |
| 15 | O     | 2534 – 2543                                               | Not Detected                                                        | No                                 |
| 16 | P     | 2544 – 2553                                               | Not Detected                                                        | No                                 |
| 17 | Q     | 2554 – 2563                                               | Not Detected                                                        | No                                 |
| 18 | R     | 2564 – 2573                                               | Not Detected                                                        | No                                 |
| 19 | S     | 2574 – 2583                                               | Not Detected                                                        | No                                 |
| 20 | T     | 2584 – 2590<br>(7 samples + <i>internal +ve control</i> ) | 21.36                                                               | Yes                                |
| 21 |       | <i>external +ve control</i>                               | 27.51                                                               | -                                  |

Note: **Group T** was spiked with one internal positive control (7 samples + 1 *internal +ve control*).

Individual testing qRT-PCR results

| Group T | IMU Ref#                    | C <sub>T</sub> value                        |                                         |
|---------|-----------------------------|---------------------------------------------|-----------------------------------------|
|         |                             | Pooled testing<br>(1 <sup>st</sup> qRT-PCR) | Individual<br>(2 <sup>nd</sup> qRT-PCR) |
| 1       | 2584                        | 21.36                                       | Not Detected                            |
| 2       | 2585                        |                                             | Not Detected                            |
| 3       | 2586                        |                                             | Not Detected                            |
| 4       | 2587                        |                                             | Not Detected                            |
| 5       | 2588                        |                                             | Not Detected                            |
| 6       | 2589                        |                                             | Not Detected                            |
| 7       | 2590                        |                                             | Not Detected                            |
| 8       | <i>internal +ve control</i> |                                             | 21.24                                   |

April 27<sup>th</sup>, 2020. IMU COVID-19 pooled testing results.

| No | Group | Pooled samples (10 samples),<br>IMU Ref#                  | Real-Time RT-PCR result of<br>pooled samples (C <sub>T</sub> value) | Proceed with individual<br>testing |
|----|-------|-----------------------------------------------------------|---------------------------------------------------------------------|------------------------------------|
| 1  | A     | 2591 – 2600                                               | Not Detected                                                        | No                                 |
| 2  | B     | 2601 – 2610                                               | Not Detected                                                        | No                                 |
| 3  | C     | 2611 – 2620                                               | 36.1                                                                | Yes                                |
| 4  | D     | 2621 – 2630                                               | Not Detected                                                        | No                                 |
| 5  | E     | 2631 – 2640                                               | Not Detected                                                        | No                                 |
| 6  | F     | 2641 – 2650                                               | Not Detected                                                        | No                                 |
| 7  | G     | 2651 – 2660                                               | Not Detected                                                        | No                                 |
| 8  | H     | 2661 – 2670                                               | Not Detected                                                        | No                                 |
| 9  | I     | 2671 – 2680                                               | Not Detected                                                        | No                                 |
| 10 | J     | 2681 – 2690                                               | Not Detected                                                        | No                                 |
| 11 | K     | 2691 – 2700                                               | Not Detected                                                        | No                                 |
| 12 | L     | 2701 – 2710                                               | Not Detected                                                        | No                                 |
| 13 | M     | 2711 – 2720                                               | Not Detected                                                        | No                                 |
| 14 | N     | 2721 – 2730                                               | Not Detected                                                        | No                                 |
| 15 | O     | 2731 – 2740                                               | Not Detected                                                        | No                                 |
| 16 | P     | 2741 – 2745<br>(5 samples + <i>internal +ve control</i> ) | 20.98                                                               | Yes                                |
| 17 |       | <i>external +ve control</i>                               | 27.32                                                               | -                                  |

Note: **Group P** was spiked with one internal positive control (5 samples + 1 *internal +ve control*).

**Individual testing qRT-PCR results**

| Group C | IMU Ref# | C <sub>T</sub> value                        |                                         |
|---------|----------|---------------------------------------------|-----------------------------------------|
|         |          | Pooled testing<br>(1 <sup>st</sup> qRT-PCR) | Individual<br>(2 <sup>nd</sup> qRT-PCR) |
| 1       | 2611     | 36.1                                        | Not Detected                            |
| 2       | 2612     |                                             | 35.58                                   |
| 3       | 2613     |                                             | Not Detected                            |
| 4       | 2614     |                                             | Not Detected                            |
| 5       | 2615     |                                             | Not Detected                            |
| 6       | 2616     |                                             | Not Detected                            |
| 7       | 2617     |                                             | Not Detected                            |
| 8       | 2618     |                                             | Not Detected                            |
| 9       | 2619     |                                             | Not Detected                            |
| 10      | 2620     |                                             | Not Detected                            |

| Group P | IMU Ref#                    | C <sub>T</sub> value                        |                                         |
|---------|-----------------------------|---------------------------------------------|-----------------------------------------|
|         |                             | Pooled testing<br>(1 <sup>st</sup> qRT-PCR) | Individual<br>(2 <sup>nd</sup> qRT-PCR) |
| 1       | 2741                        | 20.98                                       | Not Detected                            |
| 2       | 2742                        |                                             | Not Detected                            |
| 3       | 2743                        |                                             | Not Detected                            |
| 4       | 2744                        |                                             | Not Detected                            |
| 5       | 2745                        |                                             | Not Detected                            |
| 6       | <i>internal +ve control</i> |                                             | 20.12                                   |
